# Supplementary material for: Construction and integrated analysis of crosstalking ceRNAs networks in laryngeal squamous cell carcinoma
Source: PeerJ. 2019 Jul 22;7:e7380. doi: 10.7717/peerj.7380 (PMC6657684; doi:10.7717/peerj.7380)
Supplement: Table S2 [file peerj-07-7380-s001.xlsx]

## Sheet: clinical information
Id	futime	fustat	age	gender	grade	stage	T	M	N
TCGA-BB-4217	187	0	68	MALE	G3	Stage IVA	T4a	M0	N2c
TCGA-CN-6023	1110	0	73	MALE	GX	Stage IVA	T3	M0	N2c
TCGA-UF-A7JF	1497	0	80	MALE	G2	Stage IVA	T4a	M0	N2a
TCGA-CN-A49B	629	0	71	MALE	G3	Stage III	T3	MX	N1
TCGA-KU-A66S	406	1	69	FEMALE	G2	Stage III	T1	MX	N1
TCGA-UF-A7J9	1358	0	75	MALE	G2	Stage IVA	T4a	M0	N0
TCGA-BA-6868	190	0	53	MALE	G2	unknow	TX	unknow	NX
TCGA-QK-A8Z8	171	1	60	FEMALE	G2	Stage IVC	T3	M1	N1
TCGA-BA-4076	415	1	39	MALE	G2	unknow	TX	unknow	NX
TCGA-CR-7388	823	1	70	FEMALE	G2	unknow	TX	unknow	NX
TCGA-CN-4739	1330	0	71	MALE	G2	Stage IVA	T4a	M0	N0
TCGA-CR-7402	911	0	68	MALE	G2	unknow	TX	unknow	NX
TCGA-CN-A63U	526	0	50	MALE	G3	Stage IVA	T3	MX	N2b
TCGA-F7-A622	359	1	75	MALE	G1	Stage III	T3	M0	NX
TCGA-CV-7422	1037	1	60	FEMALE	G3	Stage IVA	T4a	unknow	N1
TCGA-CV-7421	2	1	76	MALE	G2	Stage IVA	T4a	unknow	N0
TCGA-BB-7862	1117	0	67	MALE	G3	Stage IVA	T3	unknow	N2c
TCGA-CR-6474	564	1	51	MALE	G2	Stage IVA	T2	M0	N2b
TCGA-UF-A7JJ	490	0	68	MALE	G1	Stage IVA	T4a	M0	N0
TCGA-UF-A718	1326	0	62	MALE	G2	Stage IVA	T4a	M0	N0
TCGA-CN-A63T	225	0	60	MALE	G3	Stage IVA	T3	MX	N2b
TCGA-CV-5440	3270	0	52	MALE	G3	Stage IVA	T4a	unknow	N2b
TCGA-DQ-7589	799	0	70	MALE	G4	unknow	TX	unknow	NX
TCGA-CN-6022	202	0	49	MALE	G3	Stage IVA	T4a	M0	N1
TCGA-CN-5355	1007	0	64	MALE	G2	Stage IVA	T4a	unknow	N0
TCGA-CV-7247	577	1	55	MALE	G2	Stage III	T3	unknow	N0
TCGA-F7-8298	490	0	58	MALE	G1	Stage I	T1	M0	N0
TCGA-F7-7848	564	0	47	MALE	G2	Stage IVA	T4a	M0	N1
TCGA-BB-7870	2016	0	58	MALE	G3	Stage IVA	T4a	unknow	N0
TCGA-CV-6962	126	1	65	MALE	G2	Stage IVA	T4a	unknow	NX
TCGA-CV-7242	1095	0	60	FEMALE	G2	Stage II	T2	unknow	N0
TCGA-CN-6989	611	0	64	MALE	G2	Stage IVA	T3	unknow	N2c
TCGA-D6-8568	759	0	62	MALE	G2	Stage II	T2	M0	N0
TCGA-BA-A6DA	351	0	41	FEMALE	G2	Stage IVA	T4a	M0	N2c
TCGA-CN-4727	452	0	56	MALE	G2	Stage IVA	T4a	unknow	N0
TCGA-QK-AA3J	297	0	69	MALE	G3	Stage I	T1	M0	N0
TCGA-CV-A6K1	685	0	65	MALE	G2	Stage IVA	T4a	M0	N0
TCGA-CV-5443	2784	0	63	MALE	G3	Stage III	T3	unknow	N0
TCGA-DQ-7595	449	0	53	MALE	G3	unknow	TX	unknow	NX
TCGA-CN-5361	1681	0	80	MALE	G2	Stage IVA	T4a	M0	N2a
TCGA-CV-A461	2064	1	65	MALE	G2	unknow	unknow	unknow	unknow
TCGA-F7-A623	616	0	70	MALE	G1	Stage IVA	T1	M0	N2b
TCGA-CV-7248	521	1	63	FEMALE	G2	Stage IVA	T4a	unknow	N2c
TCGA-CN-4723	1699	0	67	MALE	G2	Stage IVA	T4a	unknow	N0
TCGA-D6-6826	348	1	64	FEMALE	G2	Stage IVA	T4a	unknow	N2b
TCGA-CV-6935	295	1	67	MALE	G3	Stage IVA	T3	unknow	N2c
TCGA-CR-7370	105	0	72	FEMALE	G2	unknow	TX	unknow	NX
TCGA-BB-7864	1527	0	61	MALE	G2	Stage IVA	T2	unknow	N2c
TCGA-CN-6010	630	0	53	MALE	G2	Stage IVA	T4a	unknow	N2c
TCGA-CV-7440	675	1	38	MALE	GX	Stage II	T2	unknow	NX
TCGA-CV-7245	797	0	62	MALE	G2	Stage IVA	T4a	unknow	N0
TCGA-CV-7418	789	1	62	MALE	G2	Stage IVA	T4a	unknow	N2b
TCGA-CN-A63W	348	0	48	FEMALE	G2	Stage IVA	T4a	MX	N2c
TCGA-CN-A641	367	0	47	MALE	G2	Stage IVA	T4a	MX	N2b
TCGA-CR-7398	156	0	53	FEMALE	G2	Stage II	T2	unknow	N0
TCGA-BA-6869	272	0	62	MALE	G2	Stage III	T3	unknow	N0
TCGA-D6-A6EQ	368	0	57	MALE	G3	Stage IVA	T4a	M0	N1
TCGA-CV-5435	2319	1	57	MALE	G3	Stage IVA	T4a	unknow	N2b
TCGA-CN-A497	756	0	63	MALE	G2	Stage III	T1	MX	N1
TCGA-CV-5430	4241	0	61	MALE	G3	Stage IVA	T4a	unknow	N2a
TCGA-CV-5444	2437	0	64	MALE	G3	Stage IVA	T4a	unknow	N1
TCGA-CN-6997	429	0	66	MALE	G3	Stage IVA	T3	unknow	N2c
TCGA-CN-5356	1045	0	56	MALE	G2	Stage III	T3	unknow	N0
TCGA-H7-A6C5	642	0	65	MALE	G2	Stage II	T2	M0	N0
TCGA-QK-A8ZB	296	0	68	MALE	G2	Stage IVA	T4a	M0	N0
TCGA-CV-5441	2886	0	58	MALE	G3	Stage IVA	T4a	unknow	N2b
TCGA-BA-5555	186	0	54	MALE	G2	Stage IVA	T3	unknow	N2c
TCGA-CV-A45W	1398	1	75	MALE	G2	Stage II	T2	M0	N0
TCGA-CR-7399	181	0	60	FEMALE	G3	Stage IVA	T3	M0	N2c
TCGA-CV-7261	1512	0	57	MALE	G2	Stage IVA	T4a	unknow	N0
TCGA-UF-A7JK	424	1	59	MALE	G2	Stage IVA	T4a	M0	N2b
TCGA-F7-A50I	92	0	72	MALE	G2	Stage IVA	T4a	M0	N0
TCGA-CN-6992	1066	0	61	MALE	G2	Stage IVA	T3	unknow	N2b
TCGA-CN-5360	1277	0	68	MALE	G2	Stage IVA	T4a	M0	N0
TCGA-D6-6824	77	0	61	MALE	G2	Stage IVA	T4a	unknow	N0
TCGA-CN-4738	436	1	53	MALE	G2	Stage IVA	T4a	M0	N0
TCGA-CV-7424	453	1	67	MALE	G2	Stage IVA	T3	unknow	N2b
TCGA-D6-A6EK	483	0	67	MALE	G1	Stage III	T2	M0	N1
TCGA-DQ-5629	941	1	64	MALE	G2	unknow	TX	unknow	NX
TCGA-CR-7371	94	1	45	FEMALE	G2	Stage III	T3	M0	N1
TCGA-CV-5432	3930	0	68	MALE	G3	Stage III	T3	unknow	N0
TCGA-CV-5434	3314	1	60	MALE	G2	Stage IVA	T4a	unknow	N2b
TCGA-BA-4078	276	1	83	MALE	G2	unknow	unknow	unknow	unknow
TCGA-CV-A460	1838	1	72	MALE	G3	unknow	T1	M0	N2
TCGA-D6-A6ES	389	0	50	MALE	G2	Stage IVA	T4a	M0	N0
TCGA-CV-5978	215	1	53	FEMALE	G2	Stage IVB	T4a	unknow	N3
TCGA-UF-A71D	1252	0	54	FEMALE	G2	Stage IVA	T4a	M0	N0
TCGA-CV-7430	495	1	56	MALE	G2	Stage IVA	T4a	unknow	N0
TCGA-CR-7374	30	0	67	FEMALE	G2	unknow	TX	unknow	NX
TCGA-CV-7089	1972	1	74	MALE	G2	Stage IVA	T4a	unknow	N2c
TCGA-CV-5431	522	1	73	MALE	G3	Stage IVA	T3	unknow	N2c
TCGA-D6-A74Q	338	0	67	MALE	G3	Stage IVA	T4a	M0	N0
TCGA-CV-7177	663	1	82	FEMALE	G2	Stage II	T2	unknow	NX
TCGA-BA-6870	451	1	60	FEMALE	G2	unknow	TX	unknow	NX
TCGA-TN-A7HJ	403	0	51	MALE	G2	Stage IVA	T4a	M0	N2b
TCGA-CV-A45Z	1466	1	75	MALE	G3	unknow	T1	M0	N0
TCGA-D6-6517	292	0	59	MALE	G2	Stage III	T3	unknow	N0
TCGA-CR-7364	1435	0	66	MALE	G2	Stage III	T3	M0	N0
TCGA-CN-A6V3	298	0	61	MALE	G3	Stage IVA	T3	M0	N2b
TCGA-CN-4722	799	0	61	FEMALE	G1	Stage II	T2	unknow	N0
TCGA-CV-7437	506	1	77	MALE	GX	Stage II	T2	unknow	NX
TCGA-CN-5363	253	1	48	MALE	G3	Stage IVB	T4a	M0	N3
TCGA-CN-6012	629	0	66	MALE	G2	Stage IVA	T3	unknow	N2c
TCGA-CN-6021	276	1	63	FEMALE	G2	unknow	TX	unknow	NX
TCGA-BA-A6DI	336	1	62	MALE	G2	unknow	TX	M0	NX
TCGA-CN-6988	318	0	47	MALE	G3	Stage IVA	T4a	unknow	N2b
TCGA-CV-7415	695	1	60	MALE	G2	Stage IVA	T4a	unknow	N2c
TCGA-CR-7389	392	0	55	MALE	G2	unknow	TX	unknow	NX
TCGA-CV-7410	6417	1	61	MALE	GX	Stage III	T2	unknow	N1
TCGA-T3-A92M	417	0	52	MALE	G2	Stage IVA	T4a	MX	N2c
TCGA-UF-A7JH	665	0	59	MALE	G1	Stage IVA	T4a	M0	N0
TCGA-CV-7433	601	1	49	MALE	G3	Stage IVA	T4a	unknow	N2b
TCGA-CV-7101	160	1	80	MALE	G2	Stage II	T2	unknow	NX
TCGA-CV-A45Y	2703	1	61	MALE	G3	Stage IVA	T4a	M0	N0
TCGA-CN-4735	1250	0	52	MALE	G3	Stage IVA	T3	unknow	N2b
TCGA-CV-7250	2900	1	64	MALE	G1	Stage IVA	T4a	unknow	N0
TCGA-HD-7229	316	0	60	MALE	G3	Stage IVA	T4a	unknow	N0
